# Supplementary material
Source: Springer Nature journal article supplement (https://www.springermedizin.de/resource/supplementary/13075_2010_2966_MOESM5_ESM.pdf/9693296)

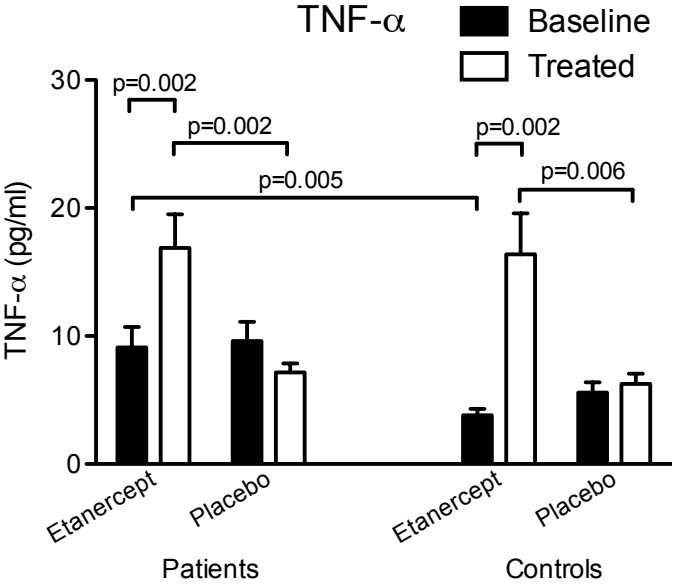

Supplement: MOESM5 [file 9693296]
